# Supplementary material for: Cold Exposure Affects Lipid Metabolism, Fatty Acids Composition and Transcription in Pig Skeletal Muscle
Source: Front Physiol. 2021 Oct 6;12:748801. doi: 10.3389/fphys.2021.748801 (PMC8526723; doi:10.3389/fphys.2021.748801)
Supplement: Supplementary file 2 [file Data_Sheet_2.xlsx]

## Sheet: Sheet1
样品名称	LDM-R1	LDM-R2	LDM-R3	LDM-R4	LDM-R5	LDM-C1	LDM-C2	LDM-C4	LDM-C5	LDM-C6	Mean (RT)	Mean (COLD)		T test
C10:0	0.00688428	0.00920656	0.0090719	0.0075588	0.00699737	0.0120001	0.0146334	0.0165216	0.00961778	0.0149839	0.00794378	0.0135514	1.70591	0.00283189
C12:0	0.00634425	0.00776108	0.00819292	0.00570057	0.00690205	0.00998906	0.0135029	0.0143029	0.00810017	0.0112347	0.00698017	0.0114259	1.63691	0.00661591
C14:0	0.111021	0.142012	0.14057	0.0902872	0.115509	0.189457	0.26184	0.250337	0.144155	0.174122	0.11988	0.203982	1.70156	0.0090402
C14:1	0.00165162	0.00224613	0.00168807	0.00149485	0.0013098	0.00188108	0.00244656	0.00226541	0.000750617	0.0014959	0.0016781	0.00176791	1.05352	0.79877
C15:0	0.000596983	0.000680315	0.000970674	0.00108501	0.000802525	0.000728338	0.00139993	0.00187633	0.00218612	0.00111893	0.000827102	0.00146193	1.76753	0.0501393
C16:0	3.20197	4.01614	4.27261	3.12673	4.15818	5.09259	7.3847	7.58071	4.47266	6.19463	3.75512	6.14506	1.63645	0.00675554
C16:1	0.232357	0.300388	0.216385	0.167929	0.243698	0.352146	0.431014	0.453913	0.244099	0.344151	0.232152	0.365065	1.57253	0.0145512
C17:0	0.0105639	0.0115922	0.0127247	0.0112819	0.0115829	0.0169305	0.0211014	0.0211786	0.0156062	0.0169001	0.0115491	0.0183434	1.58829	0.000521836
C18:0	0.246315	0.204531	0.371362	0.276617	0.285312	0.321699	0.3713	0.513697	0.299681	0.3144	0.276827	0.364155	1.31546	0.106152
C18:1n9c	2.67916	3.42379	3.17375	2.45141	3.27293	4.3617	5.79853	6.69976	3.59583	5.74957	3.00021	5.24108	1.74691	0.00505563
C18:2n6c	0.805536	0.861703	0.942247	0.812129	1.01199	0.892671	1.53161	1.79429	1.16078	1.22219	0.88672	1.32031	1.48898	0.0274085
C20:0	0.0139478	0.018125	0.0175931	0.0135385	0.0161913	0.0180517	0.0307726	0.0300173	0.0175112	0.0261501	0.0158791	0.0245006	1.54294	0.0207631
C18:3n6	0.00435213	0.00385295	0.00538956	0.00480059	0.00396595	0.00411108	0.00484798	0.00571694	0.00551883	0.00484314	0.00447224	0.00500759	1.11971	0.219139
C20:1	0.0433826	0.0586758	0.0547552	0.0400011	0.0636	0.0706847	0.0942948	0.104943	0.0572533	0.0832611	0.052083	0.0820874	1.57609	0.0137743
C18:3n3	0.0260571	0.0299449	0.0282822	0.0239601	0.0296979	0.0290106	0.0517018	0.0656292	0.0377463	0.0436406	0.0275884	0.0455457	1.6509	0.0221407
C20:2	0.0276192	0.0308519	0.0277212	0.0248907	0.0354198	0.0323492	0.0571008	0.0697803	0.0419843	0.0451303	0.0293006	0.049269	1.6815	0.0178297
C20:3n6	0.0173457	0.0196943	0.0235387	0.0200784	0.019941	0.0179663	0.0231487	0.0264588	0.0222344	0.0185908	0.0201196	0.0216798	1.07755	0.422834
C20:3n3	0.0787422	0.0838966	0.0734692	0.0680954	0.194782	0.0794576	0.0765852	0.0753806	0.0779651	0.0805532	0.0997971	0.0779883	0.781469	0.388369
C20:4n6	0.149206	0.138348	0.151983	0.14523	0.15393	0.13518	0.152478	0.155341	0.161368	0.13332	0.14774	0.147537	0.998631	0.975022
C22:2	0.00227095	0.00257511	0.00186518	0.00198594	0.00481298	0.0024289	0.00260738	0.00272287	0.00276862	0.00272737	0.00270203	0.00265103	0.981123	0.927778
C24:0	0.00290294	0.0020281	0.00261957	0.00224876	0.0018684	0.00225753	0.00256966	0.00266907	0.00214919	0.00157822	0.00233356	0.00224473	0.961936	0.750952
C20:5n3	0.00200475	0.00206008	0.00252195	0.00234556	0.00402661	0.00172318	0.00279507	0.00390665	0.0034549	0.00283898	0.00259179	0.00294376	1.1358	0.519637
C24:1	0.00292267	0.002273	0.00231046	0.00188442	0.00362742	0.00236046	0.0028425	0.00364835	0.00443353	0.00242149	0.00260359	0.00314126	1.20651	0.313876
C22:6n3	0.00592465	0.00248663	0.00263175	0.0026176	0.00323976	0.00218875	0.00612573	0.00424403	0.00463299	0.00416189	0.00338008	0.00427068	1.26348	0.353521
C10:0	0.00688428	0.00920656	0.0090719	0.0075588	0.00699737	0.0120001	0.0146334	0.0165216	0.00961778	0.0149839	0.0087099	0.0128753	1.47824	0.00283189
C12:0	0.00634425	0.00776108	0.00819292	0.00570057	0.00690205	0.00998906	0.0135029	0.0143029	0.00810017	0.0112347	0.00767525	0.0108349	1.41167	0.00661591
C14:0	0.111021	0.142012	0.14057	0.0902872	0.115509	0.189457	0.26184	0.250337	0.144155	0.174122	0.134138	0.191098	1.42464	0.0090402
C15:0	0.000596983	0.000680315	0.000970674	0.00108501	0.000802525	0.000728338	0.00139993	0.00187633	0.00218612	0.00111893	0.000964303	0.00162959	1.68992	0.0501393
C16:0	3.20197	4.01614	4.27261	3.12673	4.15818	5.09259	7.3847	7.58071	4.47266	6.19463	4.20805	5.45578	1.29651	0.00675554
C17:0	0.0105639	0.0115922	0.0127247	0.0112819	0.0115829	0.0169305	0.0211014	0.0211786	0.0156062	0.0169001	0.0133081	0.0177179	1.33136	0.000521836
C18:0	0.246315	0.204531	0.371362	0.276617	0.285312	0.321699	0.3713	0.513697	0.299681	0.3144	0.294238	0.358463	1.21827	0.106152
C20:0	0.0139478	0.018125	0.0175931	0.0135385	0.0161913	0.0180517	0.0307726	0.0300173	0.0175112	0.0261501	0.0188139	0.023469	1.24743	0.0207631
C24:0	0.00290294	0.0020281	0.00261957	0.00224876	0.0018684	0.00225753	0.00256966	0.00266907	0.00214919	0.00157822	0.00227841	0.00224473	0.985219	0.750952
C14:1	0.00165162	0.00224613	0.00168807	0.00149485	0.0013098	0.00188108	0.00244656	0.00226541	0.000750617	0.0014959	0.00166916	0.00194147	1.16314	0.79877
C16:1	0.232357	0.300388	0.216385	0.167929	0.243698	0.352146	0.431014	0.453913	0.244099	0.344151	0.25269	0.346132	1.36979	0.0145512
C18:1n9c	2.67916	3.42379	3.17375	2.45141	3.27293	4.3617	5.79853	6.69976	3.59583	5.74957	3.3833	4.85997	1.43646	0.00505563
C20:1	0.0433826	0.0586758	0.0547552	0.0400011	0.0636	0.0706847	0.0942948	0.104943	0.0572533	0.0832611	0.0580977	0.0761857	1.31134	0.0137743
C24:1	0.00292267	0.002273	0.00231046	0.00188442	0.00362742	0.00236046	0.0028425	0.00364835	0.00443353	0.00242149	0.00251798	0.00305746	1.21425	0.313876
C18:2n6c	0.805536	0.861703	0.942247	0.812129	1.01199	0.892671	1.53161	1.79429	1.16078	1.22219	1.01479	1.234	1.21602	0.0274085
C18:3n6	0.00435213	0.00385295	0.00538956	0.00480059	0.00396595	0.00411108	0.00484798	0.00571694	0.00551883	0.00484314	0.0047459	0.00497065	1.04736	0.219139
C18:3n3	0.0260571	0.0299449	0.0282822	0.0239601	0.0296979	0.0290106	0.0517018	0.0656292	0.0377463	0.0436406	0.0327451	0.0426231	1.30166	0.0221407
C20:2	0.0276192	0.0308519	0.0277212	0.0248907	0.0354198	0.0323492	0.0571008	0.0697803	0.0419843	0.0451303	0.0347275	0.0462856	1.33282	0.0178297
C20:3n6	0.0173457	0.0196943	0.0235387	0.0200784	0.019941	0.0179663	0.0231487	0.0264588	0.0222344	0.0185908	0.0219748	0.0206325	0.93892	0.422834
C20:3n3	0.0787422	0.0838966	0.0734692	0.0680954	0.194782	0.0794576	0.0765852	0.0753806	0.0779651	0.0805532	0.096623	0.0661049	0.684153	0.388369
C20:4n6	0.149206	0.138348	0.151983	0.14523	0.15393	0.13518	0.152478	0.155341	0.161368	0.13332	0.152872	0.142917	0.934879	0.975022
C22:2	0.00227095	0.00257511	0.00186518	0.00198594	0.00481298	0.0024289	0.00260738	0.00272287	0.00276862	0.00272737	0.00263321	0.00265103	1.00676	0.927778
C20:5n3	0.00200475	0.00206008	0.00252195	0.00234556	0.00402661	0.00172318	0.00279507	0.00390665	0.0034549	0.00283898	0.0025015	0.00294376	1.17679	0.519637
C22:6n3	0.00592465	0.00248663	0.00263175	0.0026176	0.00323976	0.00218875	0.00612573	0.00424403	0.00463299	0.00416189	0.0041552	0.00459169	1.10505	0.353521
C18:2n6c	0.805536	0.861703	0.942247	0.812129	1.01199	0.892671	1.53161	1.79429	1.16078	1.22219	1.01479	1.234	1.21602	0.0274085
C18:3n6	0.00435213	0.00385295	0.00538956	0.00480059	0.00396595	0.00411108	0.00484798	0.00571694	0.00551883	0.00484314	0.0047459	0.00497065	1.04736	0.219139
C20:3n6	0.0173457	0.0196943	0.0235387	0.0200784	0.019941	0.0179663	0.0231487	0.0264588	0.0222344	0.0185908	0.0219748	0.0206325	0.93892	0.422834
C20:4n6	0.149206	0.138348	0.151983	0.14523	0.15393	0.13518	0.152478	0.155341	0.161368	0.13332	0.152872	0.142917	0.934879	0.975022
	0.97644	1.0236	1.12316	0.982238	1.18982	1.04993	1.71208	1.98181	1.3499	1.37894	1.19438	1.40252	1.17427	0.0305789
C18:3n3	0.0260571	0.0299449	0.0282822	0.0239601	0.0296979	0.0290106	0.0517018	0.0656292	0.0377463	0.0436406	0.0327451	0.0426231	1.30166	0.0221407
C20:3n3	0.0787422	0.0838966	0.0734692	0.0680954	0.194782	0.0794576	0.0765852	0.0753806	0.0779651	0.0805532	0.096623	0.0661049	0.684153	0.388369
C20:5n3	0.00200475	0.00206008	0.00252195	0.00234556	0.00402661	0.00172318	0.00279507	0.00390665	0.0034549	0.00283898	0.0025015	0.00294376	1.17679	0.519637
C22:6n3	0.00592465	0.00248663	0.00263175	0.0026176	0.00323976	0.00218875	0.00612573	0.00424403	0.00463299	0.00416189	0.0041552	0.00459169	1.10505	0.353521
	0.112729	0.118388	0.106905	0.0970187	0.231746	0.137208	0.14916	0.131195	0.136025	0.116264
n6:n3	8.66185	8.64612	10.5061	10.1242	5.13416	9.34266	12.478	13.2864	10.9039	10.5107
SFA (%)	0.468877	0.470628	0.506663	0.483995	0.477015	0.486173	0.495829	0.471041	0.478391	0.466063
MUFA (%)	0.385395	0.403992	0.361358	0.364561	0.371508	0.411069	0.387341	0.405855	0.375499	0.426445
PUFA (%)	0.145728	0.125379	0.13198	0.151444	0.151477	0.102758	0.11683	0.123104	0.14611	0.107492
